# Supplementary material for: Paradoxical Benefits of Psychological Stress in Inflammatory Dermatoses Models Are Glucocorticoid Mediated
Source: PubMed Central journal article supplement — J Invest Dermatol. 2014 Aug 7;134(12):2890–7. doi: 10.1038/jid.2014.265 (PMC4227540; doi:10.1038/jid.2014.265), 2014-08-07
Supplement: jid2014265x1.pdf [file jid2014265x1.pdf]

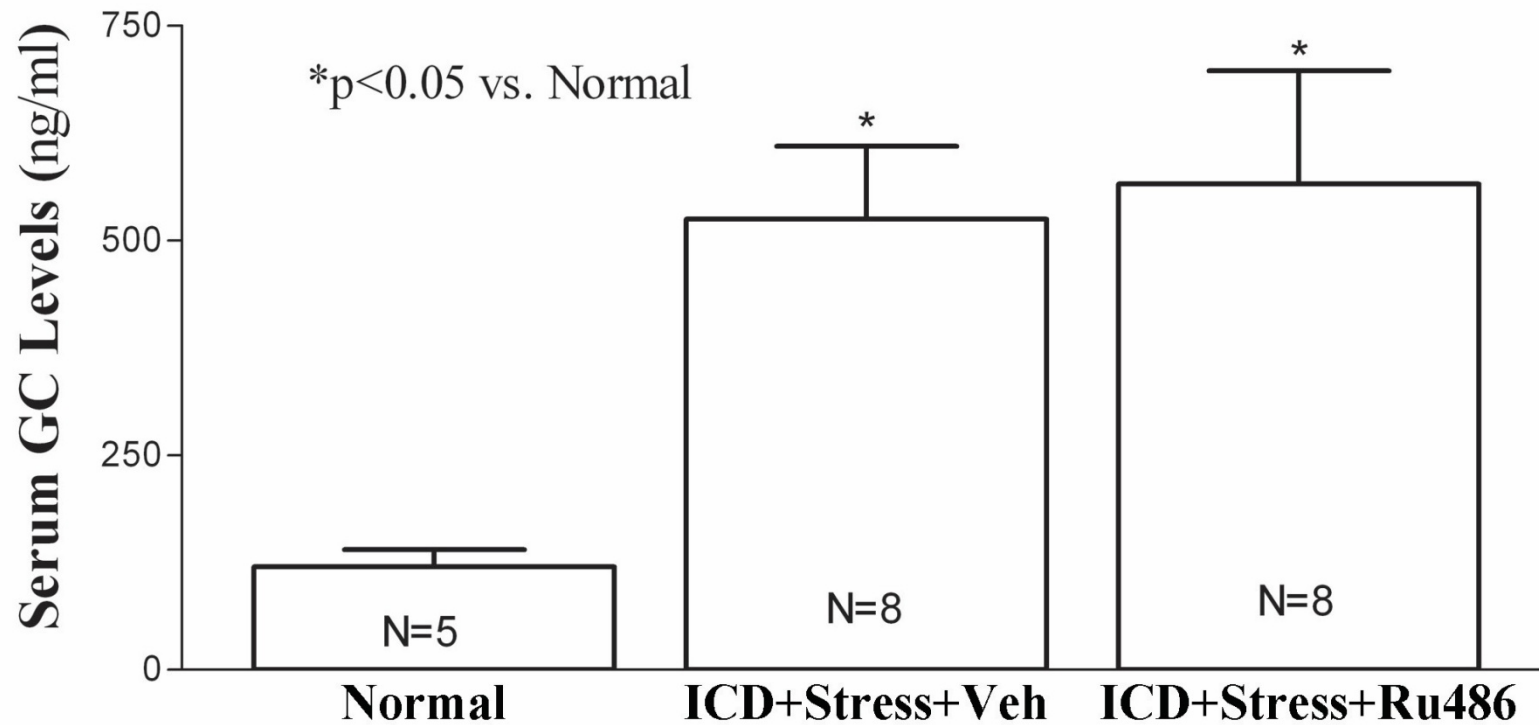

**Suppl. Fig. 1: Exogenous Stress Increases Serum GC Levels:** Blockage of GC receptor with mifepristone (Ru486) does not affect GC levels.

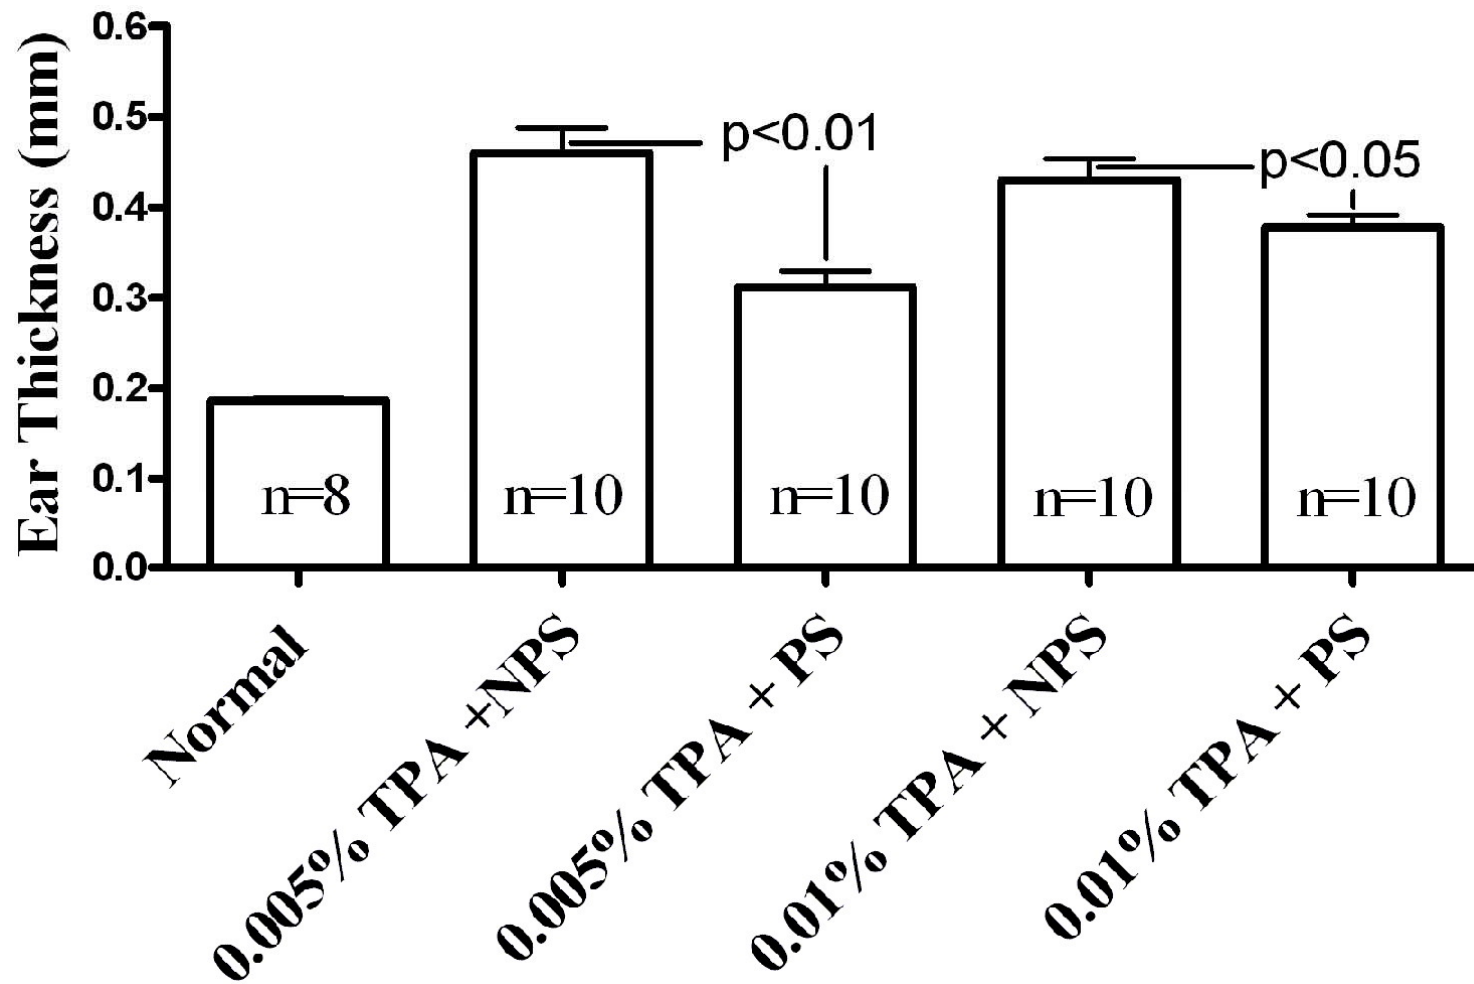

**Suppl. Fig. 2: Benefits of Stress in ICD Become Less Apparent at Higher Doses of Phorbol Ester**

**ICD**

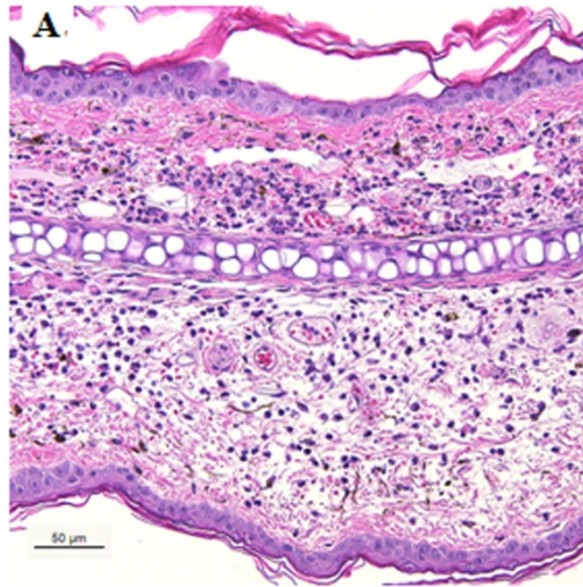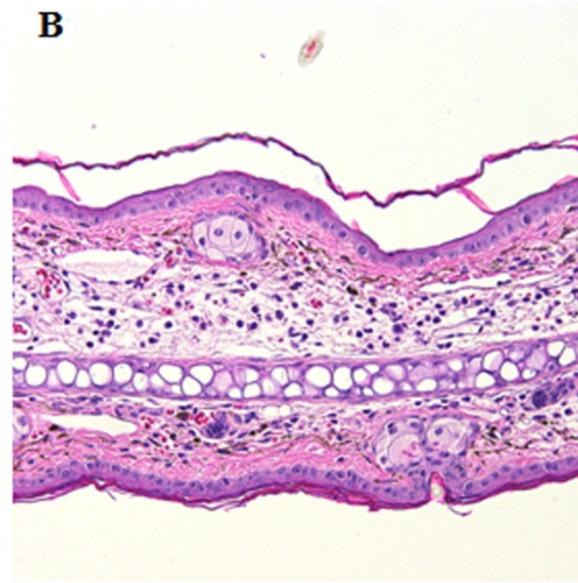

**ACD**

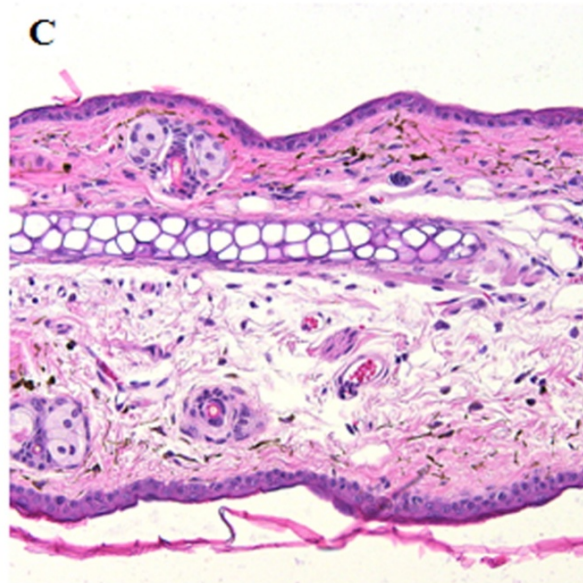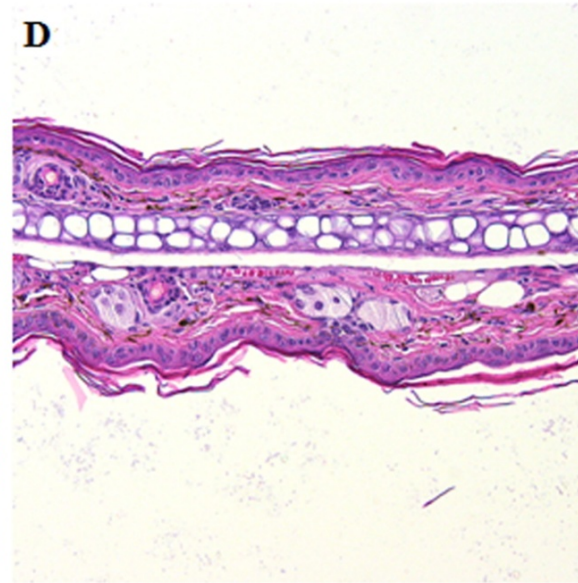

**Non-Stress**

**Stress**

**Suppl. Fig. 3: Marked Reduction in Ear Thickness and Inflammation in Stressed ICD and ACD Mice**

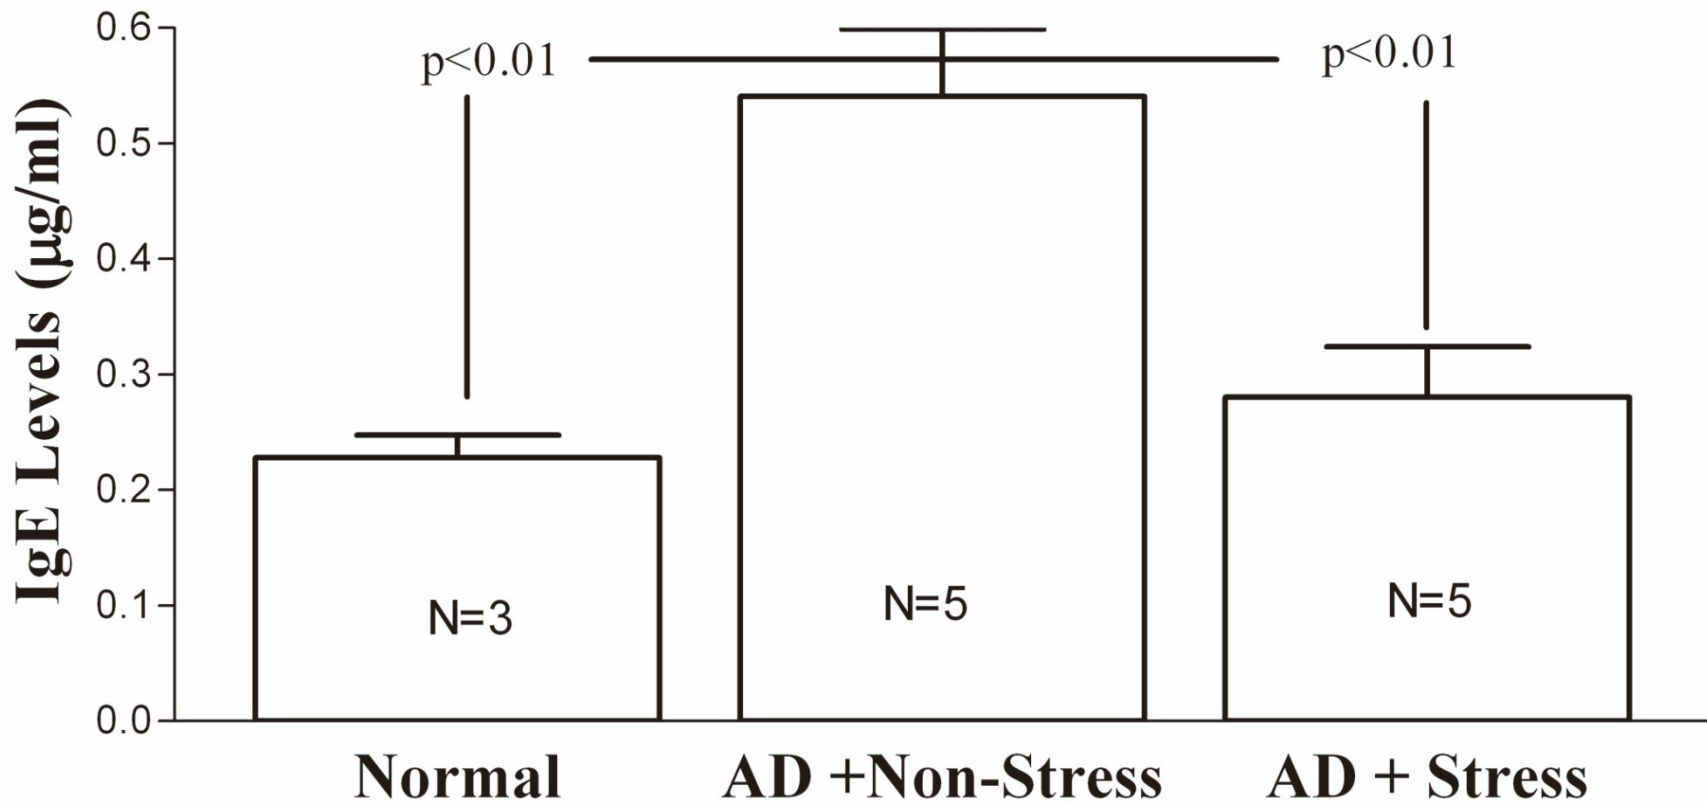

**Suppl. Fig. 4: Stress Normalizes IgE Levels in AD Mice**

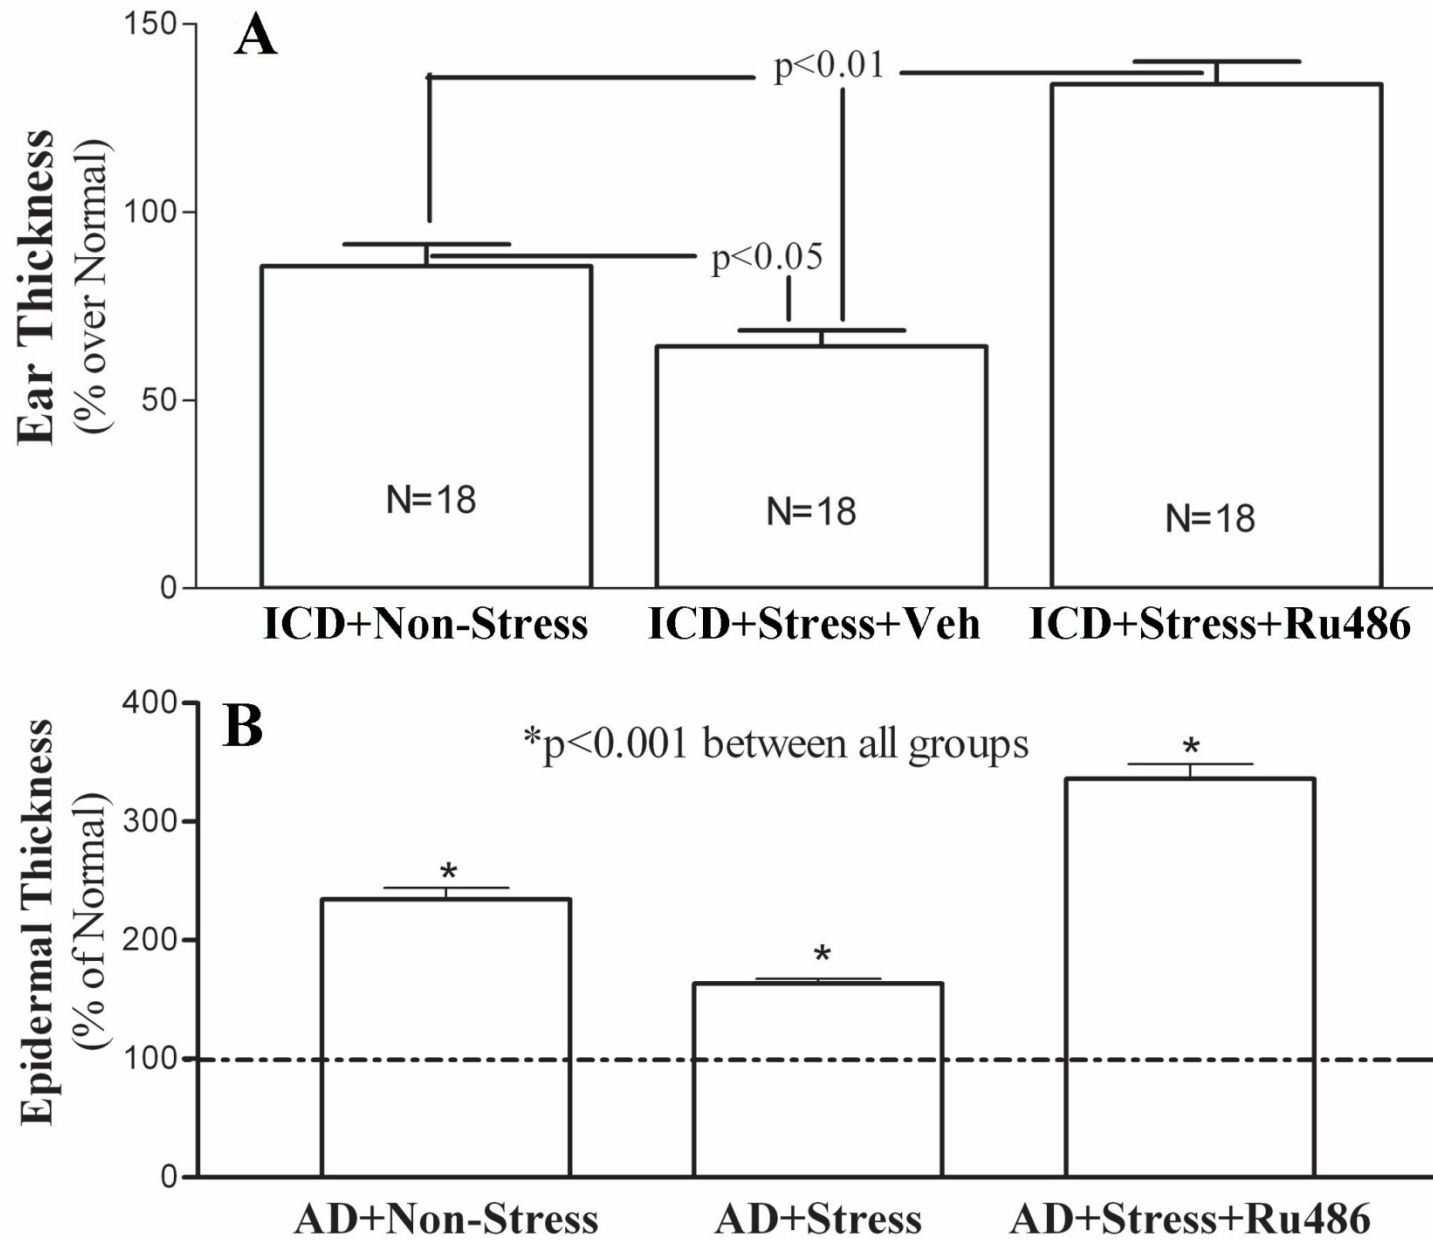

**Suppl. Fig. 5: Co-Administered Mifepristone (Ru486) Aggravates Inflammation in ICD and AD Mice**
